# Supplementary material for: COVID-19 and sickle cell disease
Source: PubMed Central journal article supplement — Haematologica. 2020 Nov 1;105(11):2501–4. doi: 10.3324/haematol.2020.255398 (PMC7604559; doi:10.3324/haematol.2020.255398), 2020-11-01
Supplement: 2020_255398-Disclosures_Contributions.pdf [file 2020_255398-Disclosures_Contributions.pdf]

Haematologica  
HAEMATOL/2020/255398  
Version 1  
COVID-19 in patients with Sickle Cell Disease

Laurel Anne Menapace and Swee Lay Thein

Disclosures: The authors declare no competing financial interests. The authors are funded by the intra-mural program of the National Institutes of Health, USA

Contributions: LAM and SLT co-wrote the paper
